# Supplementary material for: Structure-dependent luminescence of Eu3+-doped strontium vanadates synthesized with different V : Sr ratios – application in WLEDs and ultra-sensitive optical thermometry
Source: Royal Society of Chemistry journal article supplement (doi:10.1039/d2tc05341a), 2023-01-01
Supplement: d2tc05341a1.pdf [file d2tc05341a1.pdf]

**Supporting information:**

**Structure-dependent luminescence of Eu<sup>3+</sup>-doped strontium vanadates, synthesized at different V:Sr ratios – application for WLED and ultra-sensitive optical thermometry**

*Przemysław Woźny<sup>a\*</sup>, Kevin Soler-Carracedo<sup>b</sup>, Natalia Stopikowska<sup>a</sup>, Inocencio R. Martin<sup>b</sup>, Marcin Runowski<sup>a,b</sup>*

<sup>a</sup>*Adam Mickiewicz University, Faculty of Chemistry, Uniwersytetu Poznańskiego 8, 61-614 Poznań, Poland*

<sup>b</sup>*Universidad de La Laguna, MALTA-Consolider Team, IMN and IUdEA, Departamento de Física, Apdo. Correos 456, E-38200, San Cristóbal de La Laguna, Santa Cruz de Tenerife, Spain*

**Corresponding Authors**

P.W.: przemyslaw.wozny@amu.edu.pl

**Solutions preparation for synthesis:**

The Sr(NO<sub>3</sub>)<sub>2</sub> (Sigma-Aldrich, ACS >99%) was dissolved in deionized water to form a solution (0.5 M). The starting material Eu<sub>2</sub>O<sub>3</sub> (Stanford Materials, 99.99%) was dissolved in excess of the HNO<sub>3</sub> (67%, PoCH, pure, p.a.), next deionized water was added and evaporated three times to remove HNO<sub>3</sub> residues. In the end, the Eu(NO<sub>3</sub>)<sub>3</sub> was dissolved in deionized water to prepare a solution (0.5 M).

**Structural analysis:**

In the main manuscript, only selected diffractograms for the obtained structure were presented. In research, more materials around 0.67 V:Sr ratio was prepared to synthesize pure crystal structure. Here, we present diffractograms for all prepared materials in a full range of V:Sr ratio used in synthesis. We choose the material with 0.67 V:Sr for further analysis.

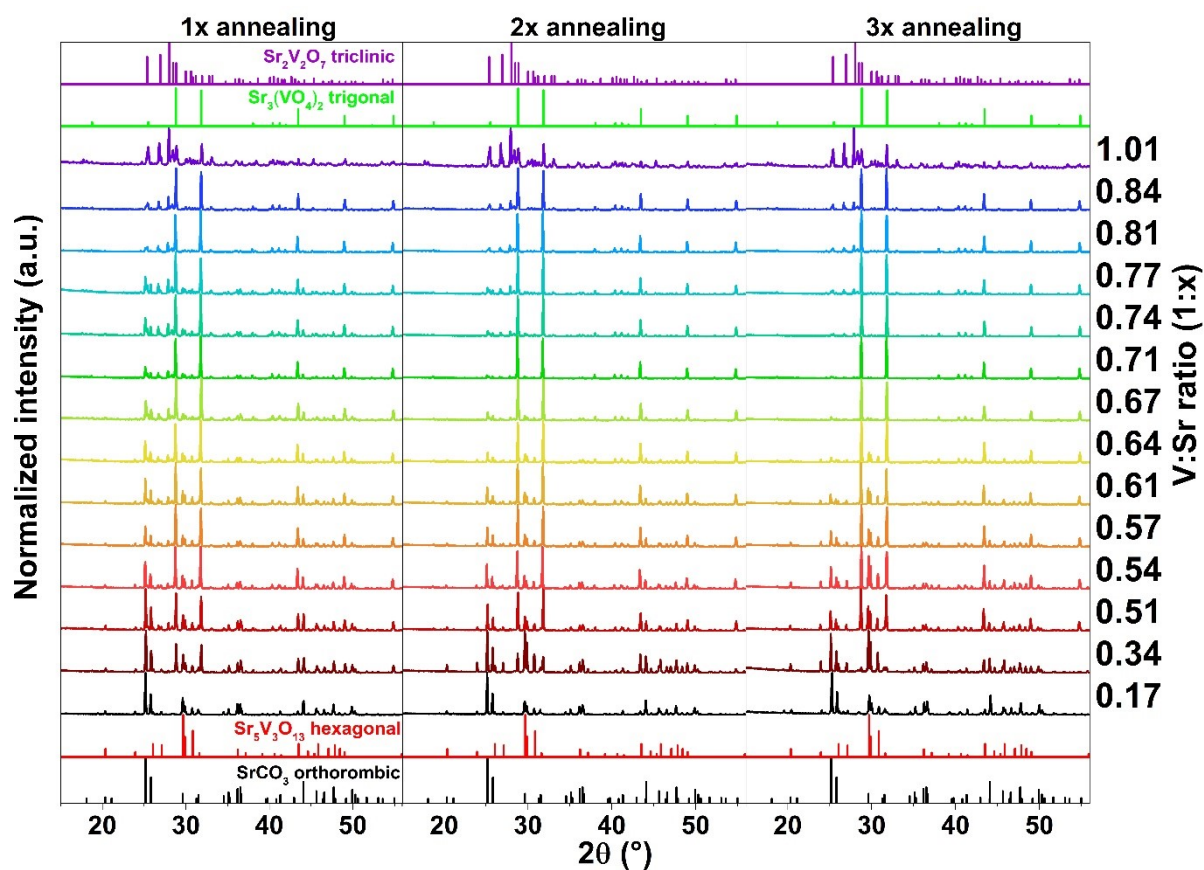

**Figure S1.** The X-ray diffraction patterns for all materials obtained with alternated V:Sr ratio.

Based on SEM images presented in **Figure 3b** size of the crystals grains were measured using ImageJ software. Obtained values of particle number and size of grains allow preparing a histogram of size distribution. The mean size of particles was calculated as 0.998  $\mu\text{m}$ , but the high value of standard deviation (0.433  $\mu\text{m}$ ) is evidence of broad particle size distribution.

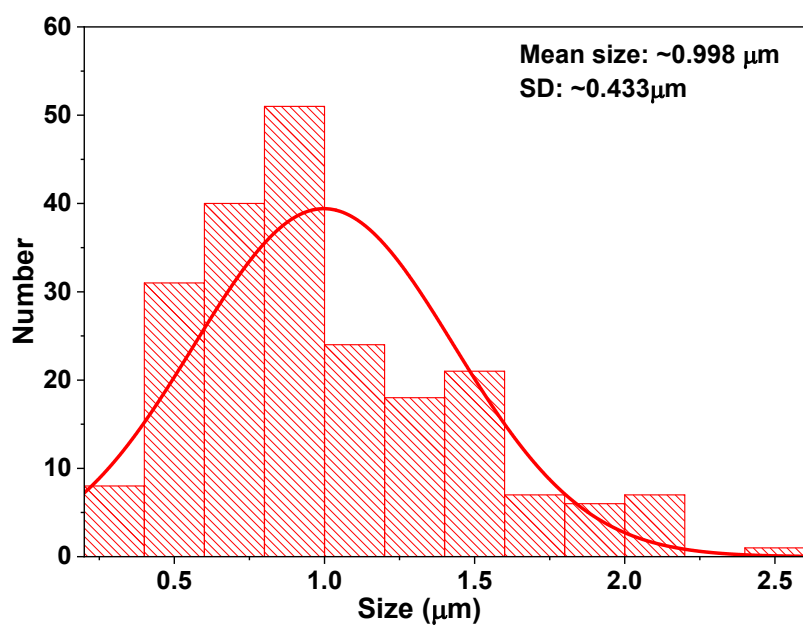

Figure S2. Histogram of the grain size for  $\text{Sr}_3\text{V}_2\text{O}_8: \text{Eu}^{3+}$  material obtained with 0.67 V:Sr ratio.

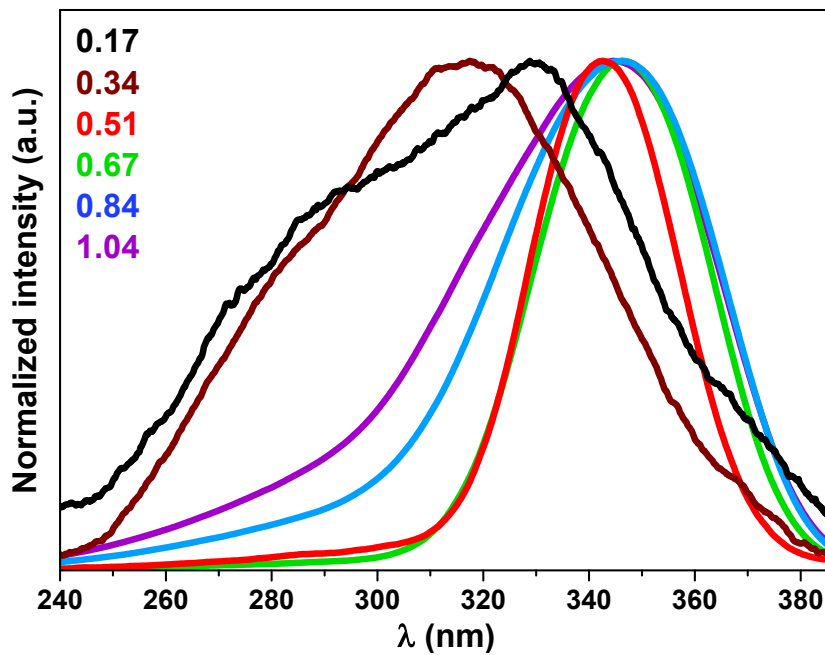

Figure S3. Normalized excitation spectra for  $\lambda_{em}$  at 540 nm for materials with different V:Sr ratios.

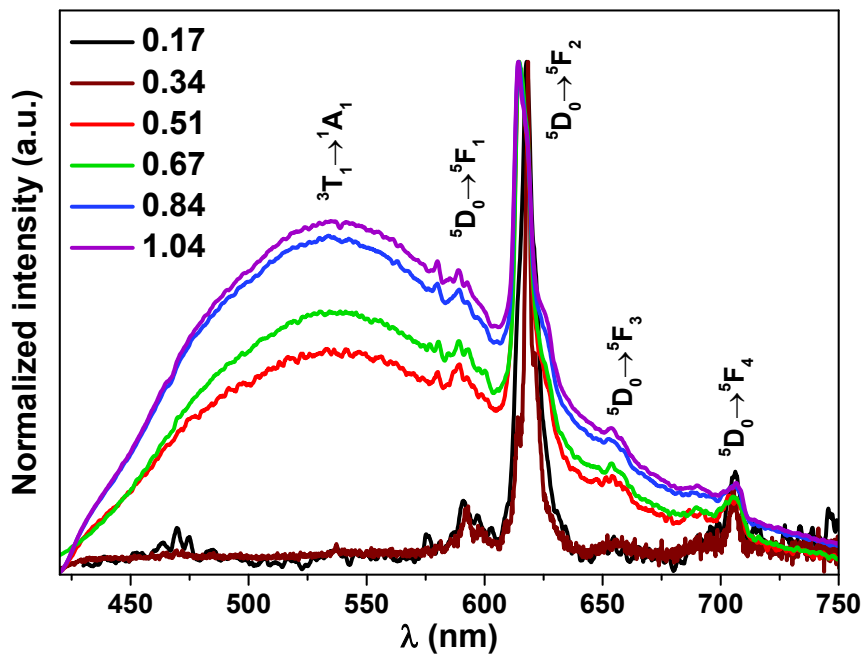

Figure S4. Normalized emission spectra recorded at  $\lambda_{ex} = 345$  nm for materials with different V:Sr ratios.

The shape of the  $\text{Eu}^{3+}$  ions emission bands is changed according to changes in the crystal structure. Material with the lowest V:Sr ratio (0.17) presents broad, overlapped sublevels with the maximum at  $\lambda = 614$  nm for the  ${}^5\text{D}_0 \rightarrow {}^7\text{F}_2$  transition. Next, the maximum emission was shifted to  $\lambda = 615$  nm where the hexagonal structure dominates. In materials with trigonal  $\text{Sr}_3\text{V}_2\text{O}_8$  crystal structure decrease of the band at  $\lambda = 615$  nm occurred, and the maximum emission was observed at  $\lambda = 612$  nm. Increase of the V:Sr ratio and the presence of  $\text{Sr}_2\text{V}_2\text{O}_7$  crystal

structure caused the band's separation at 612 nm for two bands at  $\lambda = 611$  and 613 nm. Other differences were seen for the  ${}^5D_0 \rightarrow {}^7F_0$  transition, where the low V:Sr ratio (0.17, 0.34) band with a maximum at  $\lambda = 573$  nm was observed, for materials with higher V:Sr (0.51, 0.67, 0.84) the maximum was recorded at  $\lambda = 577$  nm. An increase of vanadium species used in the synthesis caused changes in crystal structure and observation of split bands at  $\lambda = 578$  nm.

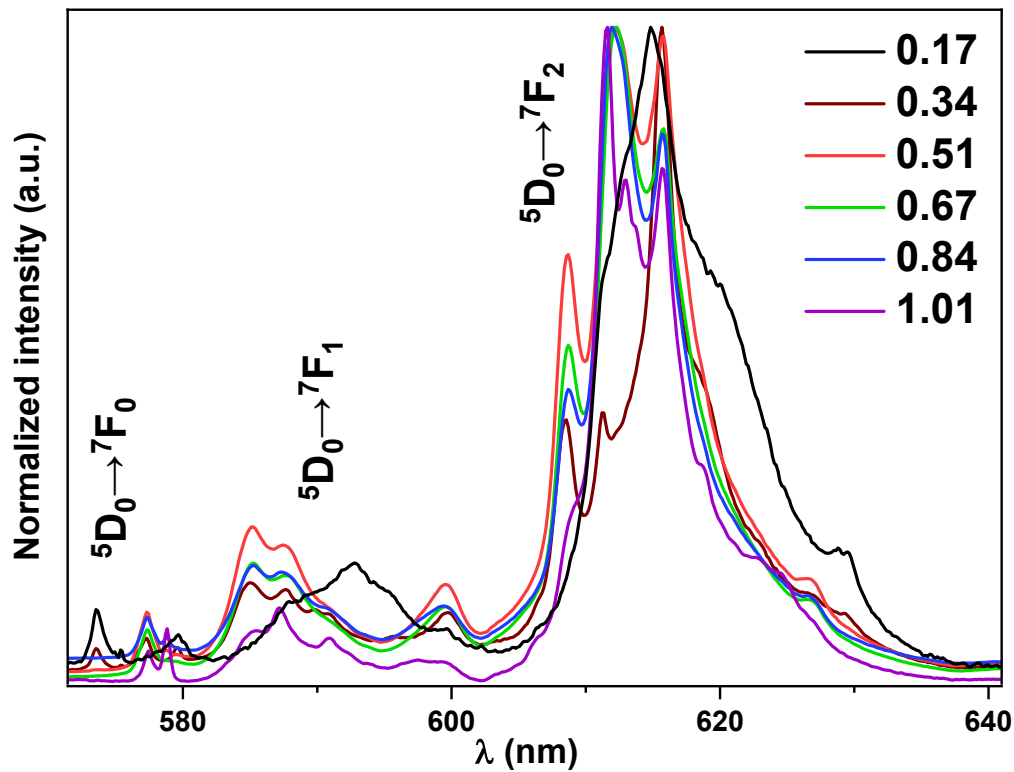

**Figure S5.** Normalized emission spectra recorded at  $\lambda_{\text{ex}} = 393$  nm for materials with different V:Sr ratios.

The normalized emission spectra of the  $\text{Sr}_3\text{V}_2\text{O}_8$  doped with altered  $\text{Eu}^{3+}$  ion concentration show minor changes in the hypersensitive  ${}^5D_0 \rightarrow {}^7F_2$  transition band. With an increase of  $\text{Eu}^{3+}$  ions content above 2% two additional Stark sub-levels, i.e., at  $\lambda = 614$  nm and  $\lambda = 618$  nm start to appear, probably due to starting of incorporation into another site of  $\text{Sr}^{2+}$  ions in the crystals structure.

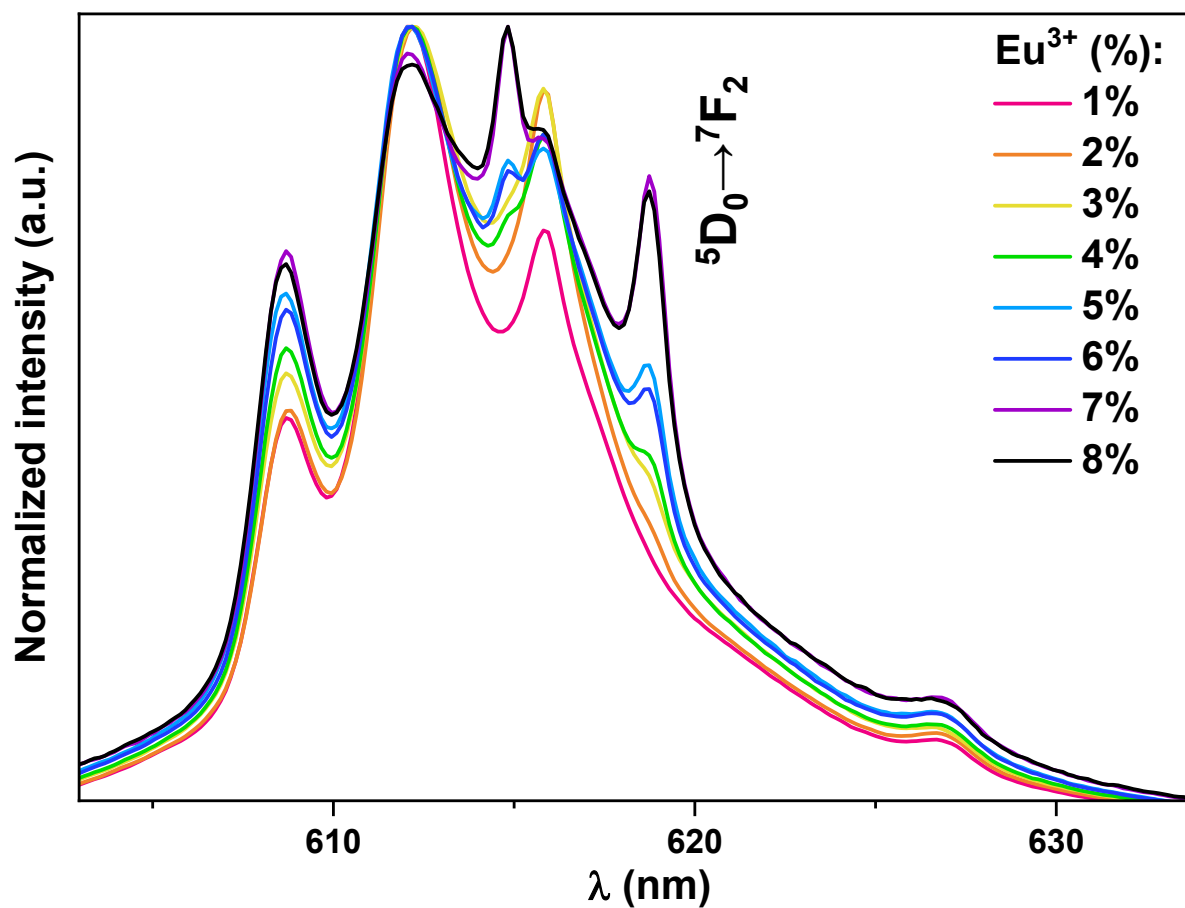

**Figure S6.** Normalized emission spectra recorded at  $\lambda_{\text{ex}} = 393 \text{ nm}$  for  $\text{Sr}_3\text{V}_2\text{O}_8$  materials with different  $\text{Eu}^{3+}$  ions content.

Asymmetry parameters increased from 1% to 2% of  $\text{Eu}^{3+}$  ions content, and decreases with further  $\text{Eu}^{3+}$  ions content incensement (**Figure S7**). Obtained results are evidence of increasing symmetry of the  $\text{Eu}^{3+}$  ions surrounding above 2% of  $\text{Eu}^{3+}$  ions content.

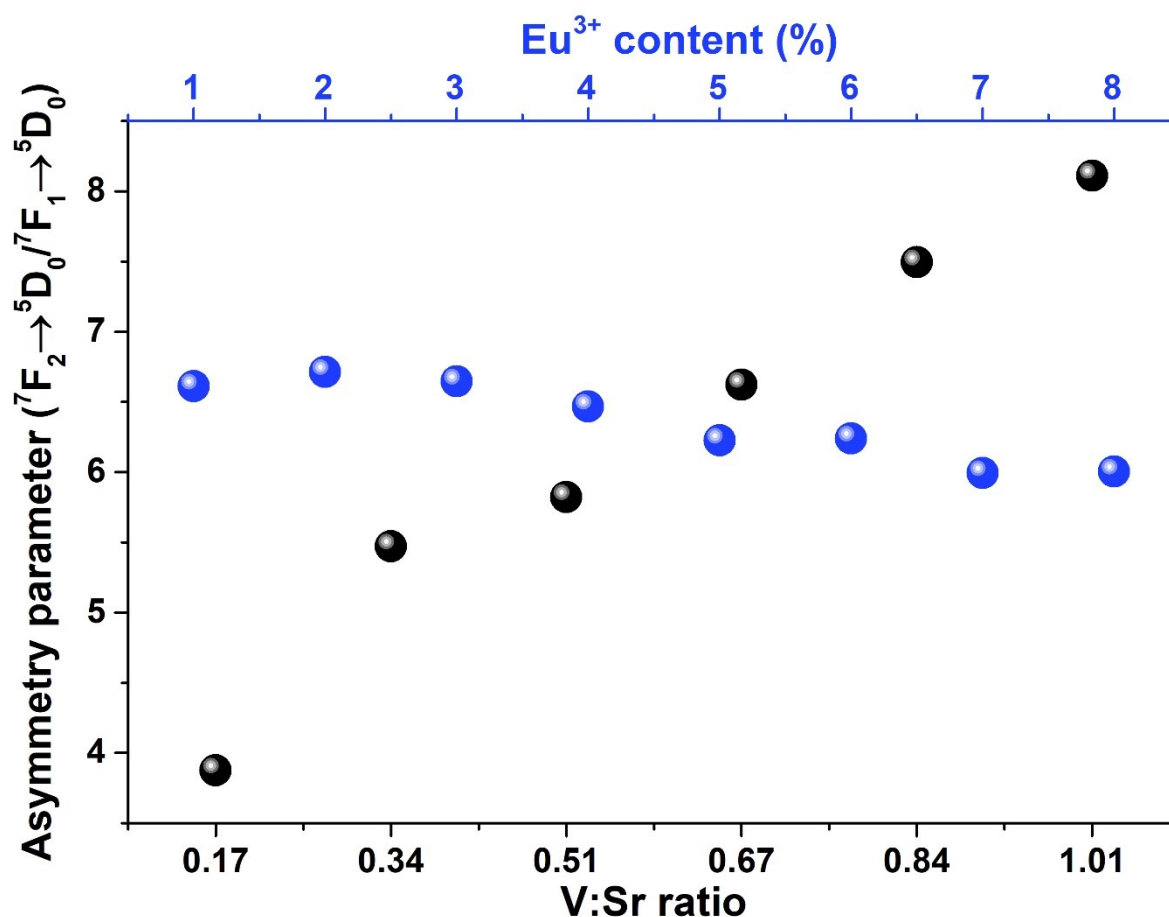

**Figure S7.** Asymmetry parameter ratio for the materials synthesized with altered V:Sr ratio and altered Eu<sup>3+</sup> ions content.

**Table S1.** Asymmetry parameter, total radiative transition probabilities ( $A_{Tot}$ ), radiative transition probabilities for each transition ( $A_{5D0 \rightarrow 7Fj}$ ), and intensity parameters ( $\Omega_2$  and  $\Omega_4$ ) for materials obtained with changed V:Sr ratio.

| V:Sr | Asymm. Par. | $A_{Tot}$ ( $s^{-1}$ ) | $A_{5D0 \rightarrow 7F1}$ ( $s^{-1}$ ) | $A_{5D0 \rightarrow 7F2}$ ( $s^{-1}$ ) | $A_{5D0 \rightarrow 7F4}$ ( $s^{-1}$ ) | $\Omega_2$ ( $10^{-20} cm^2$ ) | $\Omega_4$ ( $10^{-20} cm^2$ ) |
|------|-------------|------------------------|----------------------------------------|----------------------------------------|----------------------------------------|--------------------------------|--------------------------------|
| 0.17 | 3.877       | 1226.742               | 116.272                                | 880.440                                | 230.031                                | 11.204                         | 6.084                          |
| 0.34 | 5.473       | 1094.324               | 116.827                                | 780.884                                | 196.613                                | 9.872                          | 5.167                          |
| 0.51 | 5.823       | 1115.767               | 117.027                                | 787.258                                | 211.482                                | 9.888                          | 5.536                          |
| 0.67 | 6.623       | 1170.958               | 116.996                                | 837.023                                | 216.939                                | 10.512                         | 5.683                          |
| 0.84 | 7.495       | 1255.365               | 117.060                                | 904.538                                | 233.768                                | 11.342                         | 6.125                          |
| 1.01 | 8.112       | 1713.122               | 117.386                                | 1303.867                               | 291.870                                | 16.416                         | 7.659                          |

**Table S2.** Asymmetry parameter, total radiative transition probabilities ( $A_{Tot}$ ), radiative transition probabilities for each transition ( $A_{5D0 \rightarrow 7FJ}$ ), and intensity parameters ( $\Omega_2$  and  $\Omega_4$ ) for materials obtained with different  $\text{Eu}^{3+}$  ions concentration.

| $\text{Eu}^{3+}$<br>(%) | Asymm.<br>Par. | $A_{Tot}$<br>( $s^{-1}$ ) | $A_{5D0 \rightarrow 7F1}$<br>( $s^{-1}$ ) | $A_{5D0 \rightarrow 7F2}$<br>( $s^{-1}$ ) | $A_{5D0 \rightarrow 7F4}$<br>( $s^{-1}$ ) | $\Omega_2$<br>( $10^{-20} \text{ cm}^2$ ) | $\Omega_4$<br>( $10^{-20} \text{ cm}^2$ ) |
|-------------------------|----------------|---------------------------|-------------------------------------------|-------------------------------------------|-------------------------------------------|-------------------------------------------|-------------------------------------------|
| 1                       | 6.611          | 1104.788                  | 116.984                                   | 773.337                                   | 214.467                                   | 9.709                                     | 5.612                                     |
| 2                       | 6.715          | 1116.669                  | 116.966                                   | 785.474                                   | 214.229                                   | 9.867                                     | 5.607                                     |
| 3                       | 6.647          | 1111.945                  | 116.940                                   | 777.354                                   | 217.650                                   | 9.766                                     | 5.695                                     |
| 4                       | 6.468          | 1091.233                  | 116.981                                   | 756.681                                   | 217.571                                   | 9.506                                     | 5.692                                     |
| 5                       | 6.226          | 1060.502                  | 116.980                                   | 728.349                                   | 215.173                                   | 9.152                                     | 5.628                                     |
| 6                       | 6.241          | 1060.987                  | 116.999                                   | 730.208                                   | 213.780                                   | 9.176                                     | 5.593                                     |
| 7                       | 5.995          | 1030.192                  | 116.970                                   | 701.281                                   | 211.942                                   | 8.823                                     | 5.547                                     |
| 8                       | 6.005          | 1028.304                  | 116.933                                   | 702.153                                   | 209.218                                   | 8.834                                     | 5.475                                     |

**Figure 12a, b** present changes of the LIR parameter and band centroid shift of the overlapped CTB and  $\text{Eu}^{3+}$  ions emission, respectively. Experimental data points were fitted ( $R^2 \approx 0.99$ ) using the fifth-order polynomial functions below:

$$\text{LIR} = A_0 + A_1T^1 + A_2T^2 + A_3T^3 + A_4T^4 + A_5T^5$$

Here,  $A_0, A_1, A_2, A_3, A_4$  and  $A_5$  are constants and  $T$  is temperature. Herein, these constants are fitted to be  $A_0 = -35.58, A_1 = 0.43, A_2 = -1.94 \cdot 10^{-3}, A_3 = 4.30 \cdot 10^{-6}, A_4 = -4.69 \cdot 10^{-9}$ , and  $A_5 = 2.03 \cdot 10^{-12}$ .

The temperature-dependent can be fitted by using other fifth-order polynomial:

$$\text{Centroid} = A_0 + A_1T^1 + A_2T^2 + A_3T^3 + A_4T^4 + A_5T^5$$

Herein, these constants  $A_0$ - $A_5$  are fitted to be  $A_0 = 1122.71, A_1 = -6.24, A_2 = 0.03, A_3 = -6.02 \cdot 10^{-5}, A_4 = 6.50 \cdot 10^{-8}$  and  $A_5 = -2.85 \cdot 10^{-11}$ .

**Figure S8** present calculated integrated intensities (area under the spectra) for both CTB ( $\lambda \approx 453 - 566 \text{ nm}$ ) and  $\text{Eu}^{3+}$  ion ( $\lambda \approx 568 - 631 \text{ nm}$ ) emission after excitation at  $\lambda_{ex} = 375 \text{ nm}$  as a function of temperature. Because the CTB and  $\text{Eu}^{3+}$  ion emission spectra overlap, the CTB contributions (in the range of  $\text{Eu}^{3+}$  emission) were used as a baseline to obtain the integrated intensities of the  $\text{Eu}^{3+}$  ions. It needs to be mentioned that those values were used to further LIR calculation.

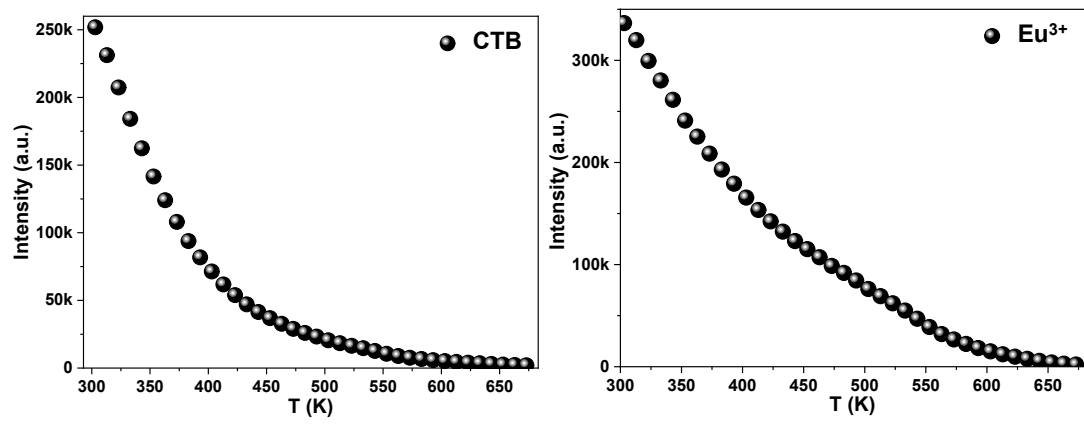

**Figure S8.** Intensity emission changes for two components in the function of temperature.
